# Supplementary material for: A single mode of population covariation associates brain networks structure and behavior and predicts individual subjects’ age
Source: PubMed Central journal article supplement (PMC8342440; doi:10.1038/s42003-021-02451-0), 2021-08-05
Supplement: 42003_2021_2451_MOESM3_ESM.pdf [file 42003_2021_2451_MOESM3_ESM.pdf]

## **Description of Additional Supplementary Files**

**File name:** Supplementary Data 1

**Description:** Data reporting all values and error bars for Figures 1-5.
